# Supplementary material for: Effects of Cover Crops and Soil Amendments on Soil CO2 Flux in a Mississippi Corn Cropping System on Upland Soil
Source: MDPI journal article supplement (doi:10.3390/environments10020019), 2023-01-26
Supplement: s1 [file s1]

# Effects of Cover Crops and Soil Amendments on Soil CO<sub>2</sub> Flux in a Mississippi Corn Cropping System on Upland Soil <sup>†</sup>

Jing Hu <sup>1,\*</sup>, Dana M. Miles <sup>2</sup>, Ardeshir Adeli <sup>2</sup>, John P. Brooks <sup>2</sup>, Frances A. Podrebarac <sup>2</sup>, Renotta Smith <sup>2</sup>, Fangni Lei <sup>3</sup>, Xiaofei Li <sup>4</sup>, Johnnie N. Jenkins <sup>2</sup> and Robert J. Moorhead II <sup>1</sup>

<sup>1</sup> Geosystems Research Institute, Mississippi State University, Starkville, MS, 39762, USA; rjm@gri.msstate.edu

<sup>2</sup> USDA-ARS, Genetics and Sustainable Agriculture Research, Starkville, MS, 39762, USA

<sup>3</sup> Eversource Energy Center, University of Connecticut, Storrs, CT 06269, USA

<sup>4</sup> Department of Agricultural Economics, Mississippi State University, Starkville, MS, 39762, USA

\* Correspondence: jingh@gri.msstate.edu; Tel.: +662-325-0912.

† Mention of trade names or commercial products in this publication is solely for the purpose of providing specific information and does not imply recommendation or endorsement by the U.S. Department of Agriculture. USDA is an equal opportunity provider and employer.

**Citation:** Hu, J.; Miles, D.M.; Adeli, A.; Brooks, J.P.; Podrebarac, F.A.; Smith, R.; Lei, F.; Li, X.; Jenkins, J.N.; II, R.J.M. Effects of Cover Crops and Soil Amendments on Soil CO<sub>2</sub> Flux in a Mississippi Corn Cropping System on Upland Soil. *Environments* **2023**, *10*, x.  
<https://doi.org/10.3390/xxxxx>

Academic Editor: Helvi  
Heinonen-Tanski

Received: 14 December 2022

Revised: 21 January 2023

Accepted: 21 January 2023

Published: 26 January 2023

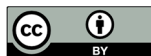

**Copyright:** © 2023 by the authors. Submitted for possible open access publication under the terms and conditions of the Creative Commons Attribution (CC BY) license (<https://creativecommons.org/licenses/by/4.0/>).

**Table S1.** Means and standard errors (SE) for CO<sub>2</sub> fluxes of each year. Values followed by letters with no letter in common denote significantly different CO<sub>2</sub> fluxes (Tukey's test,  $\alpha=0.05$ ).

| Cover crop                                 | Treatment    | 2019 |     |          | 2020 |     |          | 2021 |     |          |
|--------------------------------------------|--------------|------|-----|----------|------|-----|----------|------|-----|----------|
|                                            |              | Mean | SE  |          | Mean | SE  |          | Mean | SE  |          |
| WCC                                        | Control      | 3.3  | 0.4 | e        | 6.7  | 0.5 | a        | 7.3  | 0.8 | abcd     |
| WCC                                        | 1T FGD+L+FRT | 4.3  | 0.5 | bcde     | 5.6  | 0.2 | a        | 5.6  | 0.7 | d        |
| WCC                                        | 2T FGD+L+FRT | 4.4  | 0.4 | abcde    | 5.3  | 0.3 | a        | 5.7  | 0.4 | cd       |
| WCC                                        | 3T FGD+L+FRT | 4.6  | 0.4 | abcde    | 6.2  | 0.4 | a        | 6.0  | 0.8 | bcd      |
| WCC                                        | BL           | 14.6 | 6.9 | abc      | 6.9  | 0.5 | a        | 10.8 | 1.7 | ab       |
| WCC                                        | BL+FGD+L     | 11.6 | 3.9 | ab       | 6.1  | 0.6 | a        | 11.8 | 1.4 | a        |
| WCC                                        | FRT          | 3.8  | 0.5 | cde      | 6.1  | 0.6 | a        | 5.3  | 0.5 | d        |
| NCC                                        | Control      | 4.3  | 0.6 | bcde     | 6.7  | 0.6 | a        | 5.6  | 0.5 | cd       |
| NCC                                        | 1T FGD+L+FRT | 3.5  | 0.5 | de       | 6.6  | 0.6 | a        | 4.0  | 0.4 | d        |
| NCC                                        | 2T FGD+L+FRT | 3.5  | 0.3 | de       | 5.1  | 0.5 | a        | 4.8  | 0.6 | d        |
| NCC                                        | 3T FGD+L+FRT | 3.2  | 0.3 | e        | 5.3  | 0.3 | a        | 5.0  | 0.4 | d        |
| NCC                                        | BL           | 12.9 | 4.1 | a        | 6.9  | 0.5 | a        | 13.7 | 3.6 | a        |
| NCC                                        | BL+FGD+L     | 9.2  | 3.2 | abcd     | 6.8  | 0.4 | a        | 10.1 | 1.3 | abc      |
| NCC                                        | FRT          | 3.3  | 0.5 | de       | 5.4  | 0.4 | a        | 5.0  | 0.6 | d        |
| <b>Average across amendment treatments</b> |              |      |     |          |      |     |          |      |     |          |
| WCC                                        |              | 6.7  | 1.2 | <b>a</b> | 6.1  | 0.2 | <b>a</b> | 7.5  | 0.5 | <b>a</b> |
| NCC                                        |              | 5.9  | 0.9 | <b>a</b> | 6.1  | 0.2 | <b>a</b> | 6.9  | 0.7 | <b>b</b> |
| <b>Average across cover crops</b>          |              |      |     |          |      |     |          |      |     |          |
|                                            | Control      | 3.8  | 0.4 | <i>b</i> | 6.7  | 0.4 | <i>a</i> | 6.4  | 0.5 | <i>b</i> |
|                                            | 1T FGD+L+FRT | 3.9  | 0.3 | <i>b</i> | 6.1  | 0.3 | <i>a</i> | 4.8  | 0.4 | <i>b</i> |
|                                            | 2T FGD+L+FRT | 4.0  | 0.3 | <i>b</i> | 5.2  | 0.3 | <i>a</i> | 5.3  | 0.4 | <i>b</i> |
|                                            | 3T FGD+L+FRT | 3.9  | 0.3 | <i>b</i> | 5.7  | 0.3 | <i>a</i> | 5.5  | 0.4 | <i>b</i> |
|                                            | BL           | 13.7 | 3.9 | <i>a</i> | 6.9  | 0.3 | <i>a</i> | 12.2 | 1.9 | <i>a</i> |
|                                            | BL+FGD+L     | 10.5 | 2.5 | <i>a</i> | 6.5  | 0.4 | <i>a</i> | 11.0 | 0.9 | <i>a</i> |
|                                            | FRT          | 3.6  | 0.3 | <i>b</i> | 5.7  | 0.4 | <i>a</i> | 5.1  | 0.4 | <i>b</i> |
